# Supplementary material
Source: MDPI journal article supplement (https://www.mdpi.com/2073-4344/11/7/822)
Supplement: s1 [file s1]

## Supplementary Materials

# Effectiveness of Esterification Catalysts in the Synthesis of Poly(ethylene vanillate)

Eleftheria Xanthopoulou <sup>1,2</sup>, Alexandra Zamboulis <sup>2</sup>, Zoi Terzopoulou <sup>1,2</sup>, Margaritis Kostoglou <sup>3</sup>,  
Dimitrios N. Bikiaris <sup>2,\*</sup> and George Z. Papageorgiou <sup>1,4,\*</sup>

<sup>1</sup> Department of Chemistry, University of Ioannina, P.O. Box 1186, GR-45110 Ioannina, Greece; elefthxanthopoulou@gmail.com (E.X.); terzoe@gmail.com (Z.T)

<sup>2</sup> Laboratory of Polymer Chemistry and Technology, Department of Chemistry, Aristotle University of Thessaloniki, GR-541 24 Thessaloniki, Greece; azampouli@chem.auth.gr (A. Z.);

<sup>3</sup> Laboratory of Chemical and Environmental Technology, Aristotle University of Thessaloniki, GR-54124 Thessaloniki, Macedonia, Greece; kostoglu@chem.auth.gr (M.K)

<sup>4</sup> Institute of Materials Science and Computing, University Research Center of Ioannina (URCI), Ioannina, 45110, Greece; gzapap@uoi.gr (G.Z.P.)

\* Correspondence: dbic@chem.auth.gr (D.N.B.); gzapap@uoi.gr (G.Z.P.)

### Supplementary materials:

**Citation:** Xanthopoulou, E.; Zamboulis, A.; Terzopoulou, Z.; Kostoglou, M.; Bikiaris, D.N.; Papageorgiou, G.Z. Effectiveness of Esterification Catalysts in the Synthesis of Poly(Ethylene Vanillate). *Catalysts* **2021**, *11*, 822.  
<https://doi.org/10.3390/catal11070822>

Academic Editor: Eric M. Gaigneaux

Received: 8 June 2021

Accepted: 3 July 2021

Published: 6 July 2021

**Publisher's Note:** MDPI stays neutral with regard to jurisdictional claims in published maps and institutional affiliations.

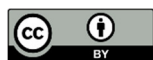

**Copyright:** © 2021 by the authors. Licensee MDPI, Basel, Switzerland. This article is an open access article distributed under the terms and conditions of the Creative Commons Attribution (CC BY) license (<http://creativecommons.org/licenses/by/4.0/>).

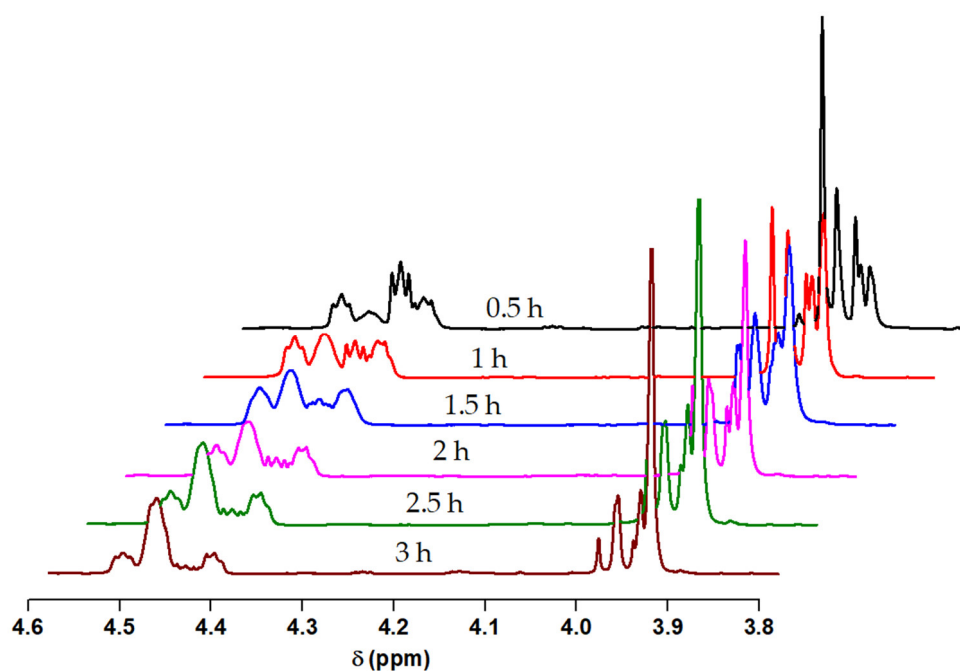

**Figure S1.** <sup>1</sup>H NMR spectra of the crude reaction mixture of the esterification performed at 200 °C, in the presence of TIS.

**Table S1.** Conversions obtained/observed in the presence of TBT, TIS and  $\text{Sb}_2\text{O}_3$  catalysts.

| PEV/TBT    |                             |                       |
|------------|-----------------------------|-----------------------|
| Time (min) | Conversion by Titration (%) | Conversion by NMR (%) |
| 0          | 0                           | 0                     |
| 30         | 33.8                        | 35.4                  |
| 60         | 53.4                        | 55.4                  |
| 90         | 60.1                        | 61.5                  |
| 120        | 66                          | 67.9                  |
| 150        | 74.1                        | 75.4                  |
| 180        | 80.3                        | 81                    |

  

| PEV/TIS    |                             |                       |
|------------|-----------------------------|-----------------------|
| Time (min) | Conversion by Titration (%) | Conversion by NMR (%) |
| 0          | 0                           | 0                     |
| 30         | 36.1                        | 40.1                  |
| 60         | 57.6                        | 59.5                  |
| 90         | 62.4                        | 64.2                  |
| 120        | 66.8                        | 69.3                  |
| 150        | 73.9                        | 75.2                  |
| 180        | 82.6                        | 84.7                  |

  

| PEV/ $\text{Sb}_2\text{O}_3$ |                             |                       |
|------------------------------|-----------------------------|-----------------------|
| Time (min)                   | Conversion by Titration (%) | Conversion by NMR (%) |
| 0                            | 0                           | 0                     |
| 30                           | 26.1                        | 28.1                  |
| 60                           | 57.4                        | 43.2                  |
| 90                           | 50.4                        | 52.6                  |
| 120                          | 56.8                        | 58.2                  |
| 150                          | 63.9                        | 66.1                  |
| 180                          | 71.6                        | 73.1                  |

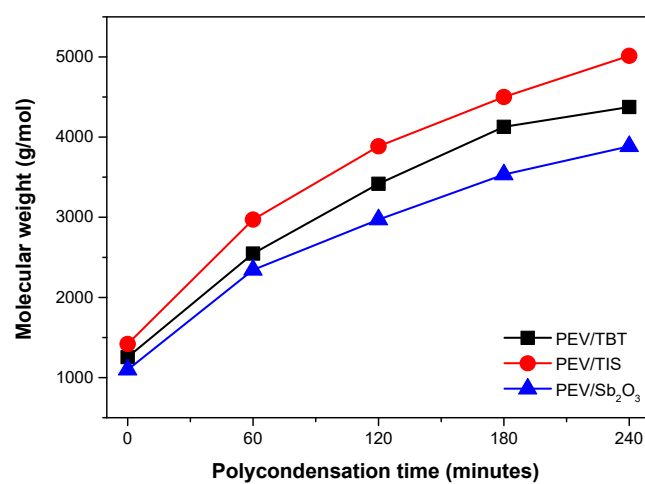**Figure S2.** Evaluation of number average molecular weight at different time intervals during the polycondensation step.

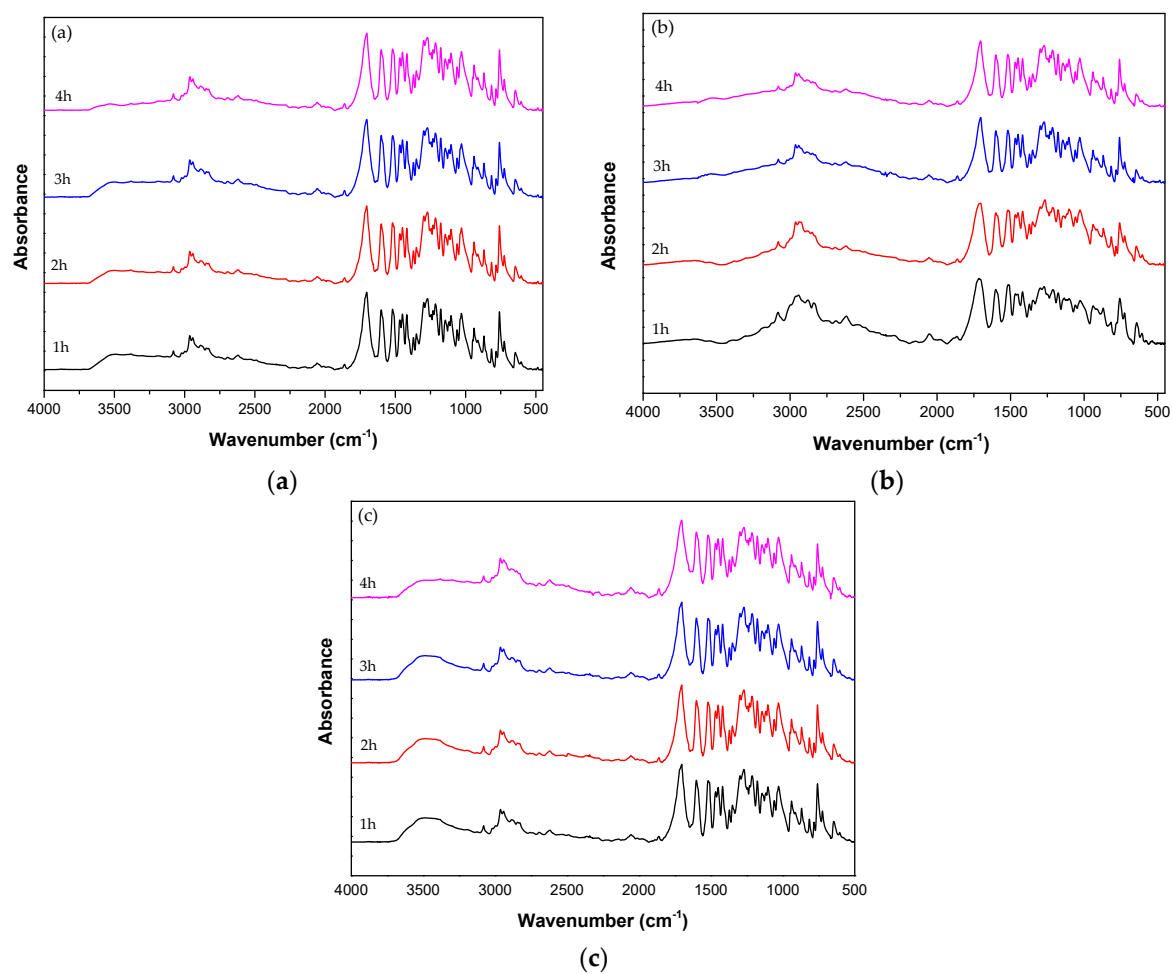

**Figure S3.** FTIR spectra of the crude reaction mixture during the polycondensation step at different time intervals in the presence of (a) TBT, (b) TIS and (c)  $\text{Sb}_2\text{O}_3$  catalyst.
